# Supplementary material for: Syntheses and magnetic properties of hexanuclear [Cp2Mn3(L1)4]2and octanuclear [Mn8(L2)12(μ4-O)2] (L1= 2-HNC5H5N, L2= 2-NH-3-Br-5-MeC5H3N, Cp = C5H5)
Source: Royal Society of Chemistry journal article supplement (doi:10.1039/b209496g), 2002-01-01
Supplement: b209496g.doc [file b209496g.doc]

**Supplementary data**

Compound **1**

Two models were employed. An initial curve-fit assumed two non-interacting symmetric Mn3 triangles with the spin Hamiltonian:

H = -2*J*(S1S2 + S2S3 + S1S3)

The g-value was fixed to a value of 2.0, consistent with a 6S ground term in which all orbital angular momentum is quenched. A two-parameter fit of J and a temperature independent paramagnetism (TIP) term yielded *J* = -3.2 K, TIP = 0.

Given the asymmetry in the structure, an asymmetric model was utilised:

H = -2*J*1(S1S2 + S1S3) – 2*J*2(S2S3)

Solution of this Hamiltonian yielded 27 spin states ranging from ST = ½ to ST = 15/2:

where and

A three parameter fit yield a much-improved fit to the data with ***J***1 = -3.0 K, ***J***2 = -5.4 K and TIP = 0.003.

All refinements used in-house software (J.M. Rawson , University of Cambridge 2002) and minimised the function |Tobs – Tcalc|/n where n = no. data points collected.

Compound **2**

The model for this compound was derived from the Hamiltonian for a symmetrical tetrahedron:

H=-2*J*(S1S2 + S1S3 + S1S4 + S2S3 + S2S4 + S3S4) yielding the following equation for the susceptibility of two non-interacting tetrahedra:

which gives *J*=-40.0(3) K for *g*=2

This was subsequently modified by inclusion of a Mean Field term to give:

which gives *J*=-21.7(7) K and Θ=-9.3(5) K.

Fitting of data for **2** was performed using Microcal Origin.

† *Synthesis of [Cp2Mn3(L1)4]2*(**1**): A solution of Cp2Mn10 (0.10g, 0.54mmol) in toluene (10ml) was added drop-wise to a solution of2-amino pyridine(L1H)(0.05g, 0.54mmol) in toluene (10ml) at –78oC. Stirring at –78oC (5mins) then allowing the reaction to warm to room temperature led to a colour change to green and then yellow, with a precipitate being formed. At 5ºC the solid dissolved, stirring was immediately stopped and the reaction was then stored at 25oC (continuing stirring led to precipitation of the product). Yellow crystals of **1**.toluene were obtained after 24hrs. Yield 0.09g (93% based on L1H supplied). IR (Nujol, NaCl windows), **/cm-1= 3338(w), 3304(m), 3279(w), 3238(m) (N-H str.), 3071(m) (Cp-H str.), 3021 (aryl C-H str.), 1614(s) (C...N str.), other major bands at 1317(s), 1155(s), 999(s), 856(s), 755(vs), 728(vs). 1H NMR (400.16MHz, +25oC, D6-DMSO, **/ppm= 7.04 (s.), 6.75 (s.) (aromatic C-H), 2.39 (s., Cp) (the broadness of the resonances precluded accurate integration). Elemental analysis; found C 51.8, H 4.9, N 15.4; cald. for **1** C 54.0, H 4.5, N 16.8 (the analysis is consistent with almost complete loss of the lattice toluene solvent from isolated crystalline material.

*Synthesis of [Mn8(L2)12(4-O)2].2thf* (**2**.2thf); A solution of 2-amino-3-bromo-5-methyl pyridine (L2H) (0.09g, 0.50mmol) in thf (5ml) was added drop-wise (syringe) to a solution of Cp2Mn10 (0.90g, 0.5mmol) in thf (10ml) at –78oC. The mixture turned yellow. The mixture was stirred (5mins) and then allowed to warm to room temperature, producing a bright yellow solution. Storage at room temperature produced green crystals of **2**.2thf after 2days. Yield 0.038g (32% on the basis of L2H supplied). Decomp 248oC to black solid. IR (Nujol, NaCl windows), **/cm-1= 3336(w), 3288(w) (N-H str.), 1609(m) (C...N str.), other major bands at 1200(w), 1092(s), 1045(s), 1020(s), 802(s), 722(w). 1H NMR (400.16MHz, +25oC, D6-DMSO, **/ppm= 7.67 (s.), 7.55 (s.) (aromatic C-H), 5.74 (s., N-H), 2.07, 1.69 (s., Me) (the broadness of the resonances precluded accurate integration). Elemental analysis; found C 33.3, H 3.3, N 11.8; cald. for **2**.2thf C 33.7, H 3.1, N 11.8.

‡ *Crystal data for* **1**.toluene; C67H68Mn6N16, *M* = 1427.01, orthorhombic, space group *Fdd*2, *Z* = 8, *a* = 31.3272(6), *b* = 33.1940(7), *c* = 15.9032(4)Å, *V* = 16537.3(6)Å3, *µ*(Mo–K**) = 0.931mm–1, **calc = 1.146g cm-3, *T* = 180(2)K. Data were collected on a Nonius KappaCCD diffractometer. Of a total of 29610 reflections collected, 9362 were unique (*R*int = 0.044). The structure was solved by direct methods and refined by full-matrix least squares on *F*2.Final *R*1 = 0.059 [I>2**(I)] and *wR*2 = 0.178 (all data). Absolute structure parameter 0.01(3).

*Crystal Data for* **2**.2thf; C80H88Br12Mn8N24O4, *M* = 2848.18, trigonal, space group *R*-3, *Z* = 3, *a* = 15.8023(11), *c* = 34.803(2)Å, *V* = 7526.4(9)Å3, *µ*(Mo–K**) = 5.809mm–1, **calc = 1.885g cm-3, *T* = 180(2)K. Data were collected on a Nonius KappaCCD diffractometer. Of a total of 6760 reflections collected, 2939 were unique (*R*int = 0.042). The structure was solved by direct methods and refined by full-matrix least squares on *F*2. Final *R*1 = 0.055 [I>2**(I)] and *wR*2 = 0.127 (all data). The Cp ligand attached to Mn(2) is disordered over two sites with 50% occupancy for each.

1. G. Wilkinson, F. A. Cotton, and J. M. Birmingham, *J. Inorg. Nucl. Chem.*, 1956, **1**, 95.
2. Sheldrick, G. M.; *SHELXL 97,* Program for Crystal Structure Refinement, University of Göttingen, 1997
